# Supplementary material
Source: MDPI journal article supplement (https://www.mdpi.com/2075-163X/13/9/1214)
Supplement: s1 [file s1]

**Table S1.** The calculated results of the basic granulites in the Muzhaerte by the two-pyroxene thermobarometers [1-3].

| <b>Thermobarometers</b> | <b>T<sub>max</sub> (°C)</b> | <b>T<sub>min</sub> (°C)</b> | <b>T<sub>ave</sub> (°C)</b> |
|-------------------------|-----------------------------|-----------------------------|-----------------------------|
| Wood version            | 811                         | 762                         | 789                         |
| Well version            | 860                         | 785                         | 829                         |
| Brey version            | 632                         | 533                         | 590                         |

**Table S2.** The calculated results of the basic granulites in the Muzhaerte by the Al-in-hornblende barometers [4-6].

| <b>Barometers</b>   | <b>P<sub>max</sub> (kbar)</b> | <b>P<sub>min</sub> (kbar)</b> | <b>P<sub>ave</sub> (kbar)</b> |
|---------------------|-------------------------------|-------------------------------|-------------------------------|
| Anderson version    | 4.1                           | 3.9                           | 4.0                           |
| Hammarstrom version | 5.1                           | 4.9                           | 5.0                           |
| Schmidt version     | 5.5                           | 5.3                           | 5.4                           |

## References

1. Brey, G.P.; Köhler, T. Geothermobarometry in Four-phase Lherzolites II. New Thermobarometers, and Practical Assessment of Existing Thermobarometers. *J. Petrol.* **1990**, *31*, 1353–1378.
2. Wells, P.R.A. Pyroxene Thermometry in Simple and Complex Systems. *Contr. Miner. Pet.* **1977**, *62*, 129–139.
3. Wood, B.J.; Banno, S. Garnet-Orthopyroxene and Orthopyroxene-Clinopyroxene Relationships in Simple and Complex Systems. *Contr. Miner. Pet.* **1973**, *42*, 109–124.
4. Anderson, J.L.; Smith, D.R. The effects of temperature and  $f_{\text{O}_2}$  on the Al-in-hornblende barometer. *Am. Mineral.* **1995**, *80*, 549–559.
5. Hammarstrom, J.M.; Zen, E.A. Aluminum in hornblende: An empirical igneous geobarometer. *Am. Mineral.* **1986**, *71*, 1297–1313.
6. Schmidt, M.W. Amphibole composition in tonalite as a function of pressure: An experimental calibration of the Al-in-hornblende barometer. *Contrib. Miner. Pet.* **1992**, *110*, 304–310.
